# Supplementary material
Source: publisher site journal article supplement (https://www.dovepress.com/article/157141)
Supplement: Supplementary file 1 [file get_supplementary_file.php]

**Supplemental Table 1.** Demographic features of group 3 and group 4

|                          | Group 3             | Group 4.1           | Group 4.2  | Group 4.3           | Group 4.4  | Group 4.5  | Group 4.6  | Group 4.7  |
|--------------------------|---------------------|---------------------|------------|---------------------|------------|------------|------------|------------|
| Number                   | 40                  | 359                 | 68         | 659                 | 77         | 85         | 7          | 34         |
| Male                     | 21 (52.5)           | 187 (52.1)          | 34 (50)    | 346 (52.5)          | 37 (48.1)  | 62 (72.9)  | 3 (42.9)   | 21(61.8)   |
| Age (year)               | 59 [50–66]          | 60 [54-68]          | 63 ±11     | 60 [53-66]          | 61 ±11     | 65 ±14     | 64 ±10     | 64 ±13     |
| Height (cm)              | 165<br>[160–170]    | 165<br>[160-170]    | 165 ±8     | 165<br>[160-171]    | 164 ±9     | 167 ±8     | 164 ±8     | 167 ±10    |
| Weight (kg)              | 64 [59–70]          | 64 ±11              | 62 ±9      | 65 [56-72]          | 63 ±12     | 65 ±11     | 55 ±6      | 65 ±10     |
| BMI (kg/m <sup>2</sup> ) | 23.4 ± 3.4          | 23.4<br>[21.0-25.1] | 22.9 ±3.2  | 23.6 ±3.5           | 23.4 ±4.4  | 23.6 ±3.5  | 20.5 ±2.8  | 23.3 ±3.2  |
| FVC (L)                  | 2.80 (0.83)         | 2.61<br>[2.20-3.11] | 2.41 ±0.82 | 2.67<br>[2.23-3.29] | 2.36 ±0.74 | 2.58 ±0.87 | 1.39 ±0.18 | 2.48 ±0.75 |
| FEV 1 (L)                | 2.30 (0.73)         | 2.06 ±0.73          | 1.68 ±0.76 | 2.16<br>[1.61-2.65] | 1.84 ±0.67 | 2.01 ±0.77 | 1.14 ±0.23 | 1.99 ±0.68 |
| FEV 1/FVC (%)            | 85.4<br>[75.2–91.1] | 80.1<br>[68.3-87.2] | 68.8 ±15.1 | 82.0<br>[71.2-89.6] | 78.1 ±15.3 | 78.0 ±14.3 | 82.7 ±15.4 | 79.4 ±9.9  |
| RV/TLC (%)               | 43.7 ± 9.3          | 46.9 ±8.6           | 48.9 ±8.2  | 47.0 ±9.5           | 49.7 ±7.8  | 45.2 ±9.9  | 56.7 ±8.9  | 44.9 ±5.6  |
| TLC-SB                   | 4.87 ± 0.86         | 4.51 ±0.91          | 4.21 ±1.05 | 4.41<br>[3.84-5.32] | 4.12 ±0.98 | 4.17 ±1.02 | 3.36 ±1.03 | 4.38 ±0.93 |
| DLCO SB                  | 5.97 ±1.57          | 5.36 ±1.71          | 4.47 ±1.71 | 5.45 ±1.93          | 4.28 ±1.43 | 3.92 ±2.04 | 2.91 ±0.86 | 4.95 ±1.39 |
| DLCO/VA                  | 1.31<br>[1.10–1.50] | 1.28<br>[1.08-1.44] | 1.13 ±0.35 | 1.29<br>[1.08-1.45] | 1.11 ±0.36 | 0.97 ±0.37 | 0.99 ±0.37 | 1.17 ±0.26 |
| FEV 1% pred              | 88.0<br>[73.0–94.9] | 82.0<br>[62.7-95.0] | 65.7 ±22.9 | 85.2<br>[66.2-97.7] | 73.2 ±21.7 | 76.3 ±21.6 | 51.8 ±24.5 | 75.2 ±17.7 |
| FVC% pred                | 80.8 ± 16.3         | 81.9 ±17.6          | 75.6 ±17.1 | 83.9 ±17.2          | 75.7 ±17.9 | 77.1 ±17.7 | 49.4 ±16.7 | 74.8 ±13.5 |

|                                                                    |                           |                     |                     |                     |                     |                     |             |                     |
|--------------------------------------------------------------------|---------------------------|---------------------|---------------------|---------------------|---------------------|---------------------|-------------|---------------------|
| TLC-SB% pred                                                       | 84.1 ± 4.87<br>0.86 ± 8.5 | 79.0 ± 12.7         | 74.1 ± 10.9         | 79.7 ± 12.1         | 74.5 ± 11.3         | 69.1 ± 12.3         | 57.9 ± 9.4  | 71.8 ± 10.8         |
| DLCO SB% pred                                                      | 4.87 ± 0.86               | 66.3 ± 17.4         | 58.5 ± 15.3         | 68.7<br>[58.0-79.0] | 61.0<br>[46.0-65.6] | 50.5 ± 18.2         | 35.8 ± 9.3  | 59.0 ± 13.7         |
| DLCO/VA% pred                                                      | 86.0<br>[78.6-103.6]      | 86.4 ± 20.8         | 80.0 ± 23.5         | 88.5<br>[76.3-99.7] | 76.9 ± 23.9         | 71.4 ± 25.2         | 67.4 ± 23.6 | 85.0 ± 16.7         |
| FEV <sub>1</sub> (L)<br>post-bronchodilation                       | 2.41 ± 0.74               | 2.17 ± 0.74         | 1.82 ± 0.83         | 2.20<br>[1.72-2.77] | 1.92 ± 0.68         | 2.13 ± 0.80         | 1.21 ± 0.25 | 2.04 ± 0.70         |
| FEV <sub>1</sub> /FVC (%)<br>post-bronchodilation                  | 83.4<br>[76.2-91.2]       | 81.7<br>[70.8-89.2] | 70.2 ± 15.7         | 83.8<br>[73.4-90.6] | 78.5 ± 15.6         | 81.8<br>[68.9-89.6] | 84.5 ± 12.8 | 79.7 ± 9.8          |
| FEV <sub>1</sub> %pred<br>post-bronchodilation                     | 91.0<br>[74.6-102.0]      | 86.6<br>[69.8-98.0] | 71.5 ± 24.6         | 88.5<br>[71.4-99.8] | 76.7 ± 22.7         | 81.3 ± 23.4         | 57.4 ± 34.3 | 77.7 ± 20.6         |
| FEV <sub>1</sub> /FVC < 70%<br>post-bronchodilation                | 5 (12.5)                  | 88(24.5)            | 26(38.2)            | 133(20.2)           | 15(19.5)            | 22(25.9)            | 1(14.3)     | 6(17.6)             |
| FEV <sub>1</sub> /FVC < 70%<br>positive in<br>bronchodilation test | 5 (12.5)<br>6 (15)        | 95(26.5)            | 30(44.1)            | 151(22.9)           | 21(27.3)            | 21(24.7)            | 1(14.3)     | 5(14.7)             |
| LAA%(-950HU)                                                       | NA                        | 0.33<br>[0.07-0.79] | 0.55<br>[0.18-1.67] | 0.30<br>[0.05-0.64] | 0.37<br>[0.06-0.88] | 0.38<br>[0.06-2.59] | 0.76 ± 0.79 | 0.31<br>[0.12-0.72] |
| Perc 15 (HU)                                                       | NA                        | -891<br>[-906-868]  | -896 ± 32           | -890<br>[-906-870]  | -875 ± 42           | -886<br>[-906-855]  | -854 ± 52   | -866 ± 43           |

BMI: body mass index; FVC: forced vital capacity; FEV 1: forced expiratory volume in 1 second; RV: residual volume; TLC: total lung capacity; TLCO SB: The single-breath diffusing capacity of the lung for CO; DLCO: Diffusion Capacity for Carbon Monoxide of the Lung; LAA%: percentage of the lung volume occupied by low attenuation areas; Perc n: percentile of the histogram of attenuation values.

**Supplemental Table 2.** Independent predictors of persistent airflow limitation

|                           | $\beta$ | SE    | p value | OR    | 95%CI       |
|---------------------------|---------|-------|---------|-------|-------------|
| Model 1                   |         |       |         |       |             |
| LAA%(-950HU)              | 0.792   | 0.12  | <0.001  | 2.209 | (1.75,2.79) |
| Age(year)                 | 0.026   | 0.009 | 0.006   | 1.026 | (1.01,1.04) |
| gender (male=1, female=0) | 0.608   | 0.256 | 0.018   | 1.837 | (1.11,3.03) |
| Constant                  | -3.503  | 0.588 | <0.001  |       |             |
| Model 2                   |         |       |         |       |             |
| LAA%(-950HU)              | 0.68    | 0.128 | <0.001  | 1.974 | (1.54,2.54) |
| Perc15                    | -0.017  | 0.005 | 0.002   | 0.984 | (0.97,0.99) |
| Age(year)                 | 0.029   | 0.01  | 0.003   | 1.029 | (1.01,1.05) |
| Weight(kg)                | 0.023   | 0.011 | 0.026   | 1.024 | (1.00,1.05) |
| Constant                  | -20.132 | 4.972 | <0.001  |       |             |
| Model 3                   |         |       |         |       |             |
| LAA%(-930HU)              | 0.168   | 0.041 | <0.001  | 1.183 | (1.09,1.28) |
| Perc3                     | -0.064  | 0.017 | <0.001  | 0.938 | (0.91,0.97) |
| Perc15                    | 0.039   | 0.013 | 0.003   | 1.039 | (1.01,1.07) |
| Age(year)                 | 0.026   | 0.01  | 0.01    | 1.026 | (1.01,1.05) |
| Constant                  | -27.515 | 7.041 | <0.001  |       |             |
| Model 4                   |         |       |         |       |             |
| Perc4                     | 0.218   | 0.073 | 0.003   | 1.243 | (1.08,1.43) |
| Perc8                     | -0.554  | 0.124 | <0.001  | 0.575 | (0.45,0.73) |
| Perc33                    | 0.614   | 0.172 | <0.001  | 1.847 | (1.32,2.59) |
| Perc43                    | -0.321  | 0.121 | 0.008   | 0.726 | (0.57,0.92) |
| Perc97                    | 0.042   | 0.011 | <0.001  | 1.043 | (1.02,1.07) |
| LAA%(-973HU)              | -0.304  | 0.145 | 0.036   | 0.738 | (0.56,0.98) |

|              |          |        |        |       |              |
|--------------|----------|--------|--------|-------|--------------|
| LAA%(-927HU) | 0.187    | 0.044  | <0.001 | 1.206 | (1.11,1.31)  |
| LAA%(-292HU) | 1.633    | 0.578  | 0.005  | 5.118 | (1.65,15.89) |
| Constant     | -190.496 | 53.657 | <0.001 |       |              |

LAA%: percentage of the lung volume occupied by low attenuation areas; Perc n: percentile of the histogram of attenuation values; OR: odds ratio.

**Supplemental Table 3.** The area under ROC curve of emphysema indexes and predicting model in diagnosing persistent airflow limitation

| Rule         | group 1.1   |               | group 1.2   |               |
|--------------|-------------|---------------|-------------|---------------|
|              | AUC±SD      | 95%CI         | AUC±SD      | 95%CI         |
| LAA%(-950HU) | 0.79±0.025  | (0.742,0.838) | 0.817±0.025 | (0.769,0.865) |
| LAA%(-930HU) | 0.83±0.021  | (0.788,0.872) | 0.867±0.021 | (0.825,0.908) |
| Perc 3       | 0.827±0.022 | (0.785,0.87)  | 0.869±0.021 | (0.828,0.909) |
| Perc 15      | 0.782±0.024 | (0.735,0.83)  | 0.838±0.023 | (0.794,0.882) |
| Model 1      | 0.804±0.023 | (0.758,0.85)  | 0.845±0.023 | (0.8,0.89)    |
| Model 2      | 0.815±0.023 | (0.771,0.86)  | 0.875±0.019 | (0.839,0.912) |
| Model 3      | 0.852±0.021 | (0.811,0.892) | 0.892±0.017 | (0.858,0.925) |
| Model 4      | 0.882±0.019 | (0.845,0.92)  | 0.894±0.018 | (0.858,0.93)  |

LAA%: percentage of the lung volume occupied by low attenuation areas; Perc n: percentile of the histogram of attenuation values. Model 1:  $y_1 = 0.792 \times \text{LAA}\%(-950 \text{ HU}) + 0.026 \times \text{Age}(\text{year}) + 0.608 \times \text{sex}(\text{male} = 1, \text{female} = 0) - 3.503$ . Model 2:  $y_2 = 0.68 \times \text{LAA}\%(-950 \text{ HU}) - 0.017 \times \text{Perc}15 + 0.029 \times \text{Age}(\text{year}) + 0.023 \times \text{Weight}(\text{kg}) - 20.132$ . Model 3:  $y_3 = 0.168 \times \text{LAA}\%(-930 \text{ HU}) - 0.064 \times \text{Perc} 3 + 0.039 \times \text{Perc} 15 + 0.026 \times \text{Age}(\text{year}) - 27.515$ . Model 4:  $y_4 = 0.218 \times \text{Perc} 4 - 0.554 \times \text{Perc} 8 + 0.614 \times \text{Perc} 33 - 0.321 \times \text{Perc} 43 + 0.042 \times \text{Perc} 97 - 0.304 \times \text{LAA}\%(-973 \text{ HU}) + 0.187 \times \text{LAA}\%(-927 \text{ HU}) + 1.633 \times \text{LAA}\%(-292 \text{ HU}) - 190.496$ .

**Supplemental Table 4.** Diagnostic value of emphysema extent and predicting model in diagnosing persistent airflow limitation, compared with concurrent post-bronchodilator FEV1/FVC, the best FEV1/ the best FVC and the FEV1/FVC in the spirometry with the best FEV1

| Rule                                                                        | a  | b  | c  | d   | Sensitivity | Specificity | PPV | NPV |
|-----------------------------------------------------------------------------|----|----|----|-----|-------------|-------------|-----|-----|
| <b>LAA%(-950HU)&gt;0.84%</b>                                                |    |    |    |     |             |             |     |     |
| Group 1.1, compared with concurrent post-bronchodilator FEV1/FVC            | 77 | 63 | 54 | 477 | 59%         | 88%         | 55% | 90% |
| Group 1.1, compared with the best FEV1/ the best FVC.                       | 80 | 61 | 59 | 471 | 58%         | 89%         | 57% | 89% |
| Group 1.1, compared with the FEV1/FVC in the spirometry with the best FEV1. | 77 | 64 | 53 | 477 | 59%         | 88%         | 55% | 90% |
| Group 1.2, compared with concurrent post-bronchodilator FEV1/FVC            | 65 | 45 | 41 | 328 | 61%         | 88%         | 59% | 89% |
| Group 1.2, compared with the best FEV1/ the best FVC.                       | 66 | 44 | 43 | 326 | 61%         | 88%         | 60% | 88% |
| Group 1.2, compared with the FEV1/FVC in the spirometry with the best FEV1. | 66 | 44 | 37 | 332 | 64%         | 88%         | 60% | 90% |
| <b>LAA%(-950HU)&gt;0.90%</b>                                                |    |    |    |     |             |             |     |     |
| Group 1.1, compared with concurrent post-bronchodilator FEV1/FVC            | 73 | 53 | 58 | 487 | 56%         | 90%         | 57% | 89% |
| Group 1.1, compared with the best FEV1/ the best FVC.                       | 76 | 51 | 63 | 481 | 55%         | 90%         | 60% | 88% |
| Group 1.1, compared with the FEV1/FVC in the spirometry with the best FEV1. | 73 | 54 | 57 | 487 | 56%         | 90%         | 57% | 90% |
| Group 1.2, compared with concurrent post-bronchodilator FEV1/FVC            | 62 | 39 | 44 | 334 | 58%         | 90%         | 61% | 88% |
| Group 1.2, compared with the best FEV1/ the best FVC.                       | 62 | 39 | 47 | 331 | 57%         | 89%         | 61% | 88% |
| Group 1.2, compared with the FEV1/FVC in the spirometry with the best FEV1. | 62 | 39 | 41 | 337 | 60%         | 90%         | 61% | 89% |
| <b>LAA%(-950HU)&gt;1.4%</b>                                                 |    |    |    |     |             |             |     |     |
| Group 1.1, compared with concurrent post-bronchodilator FEV1/FVC            | 58 | 26 | 73 | 514 | 44%         | 95%         | 68% | 88% |
| Group 1.1, compared with the best FEV1/ the best FVC.                       | 58 | 27 | 81 | 505 | 42%         | 95%         | 68% | 86% |
| Group 1.1, compared with the FEV1/FVC in the spirometry with the best FEV1. | 58 | 27 | 72 | 514 | 45%         | 95%         | 68% | 88% |
| Group 1.2, compared with concurrent post-bronchodilator FEV1/FVC            | 50 | 16 | 56 | 357 | 47%         | 96%         | 76% | 86% |
| Group 1.2, compared with the best FEV1/ the best FVC.                       | 50 | 16 | 59 | 354 | 46%         | 96%         | 76% | 86% |
| Group 1.2, compared with the FEV1/FVC in the spirometry with the best FEV1. | 50 | 16 | 53 | 360 | 49%         | 96%         | 76% | 87% |
| <b>LAA%(-950HU)&gt;3.0%</b>                                                 |    |    |    |     |             |             |     |     |

|                                                                             |    |    |    |     |     |     |     |     |
|-----------------------------------------------------------------------------|----|----|----|-----|-----|-----|-----|-----|
| Group 1.1, compared with concurrent post-bronchodilator FEV1/FVC            | 43 | 5  | 88 | 535 | 34% | 99% | 85% | 86% |
| Group 1.1, compared with the best FEV1/ the best FVC.                       | 44 | 8  | 95 | 524 | 32% | 98% | 85% | 85% |
| Group 1.1, compared with the FEV1/FVC in the spirometry with the best FEV1. | 44 | 8  | 86 | 533 | 34% | 99% | 85% | 86% |
| Group 1.2, compared with concurrent post-bronchodilator FEV1/FVC            | 33 | 4  | 73 | 369 | 31% | 99% | 87% | 83% |
| Group 1.2, compared with the best FEV1/ the best FVC.                       | 33 | 5  | 76 | 365 | 30% | 99% | 87% | 83% |
| Group 1.2, compared with the FEV1/FVC in the spirometry with the best FEV1. | 33 | 5  | 70 | 371 | 32% | 99% | 87% | 84% |
| Perc15<-907HU                                                               |    |    |    |     |     |     |     |     |
| Group 1.1, compared with concurrent post-bronchodilator FEV1/FVC            | 73 | 76 | 58 | 464 | 56% | 84% | 46% | 89% |
| Group 1.1, compared with the best FEV1/ the best FVC.                       | 78 | 82 | 61 | 450 | 56% | 85% | 49% | 88% |
| Group 1.1, compared with the FEV1/FVC in the spirometry with the best FEV1. | 72 | 88 | 58 | 453 | 55% | 84% | 45% | 89% |
| Group 1.2, compared with concurrent post-bronchodilator FEV1/FVC            | 63 | 52 | 43 | 321 | 61% | 86% | 55% | 89% |
| Group 1.2, compared with the best FEV1/ the best FVC.                       | 65 | 54 | 44 | 316 | 60% | 85% | 55% | 88% |
| Group 1.2, compared with the FEV1/FVC in the spirometry with the best FEV1. | 64 | 55 | 39 | 321 | 62% | 85% | 54% | 89% |
| Perc15<-910HU                                                               |    |    |    |     |     |     |     |     |
| Group 1.1, compared with concurrent post-bronchodilator FEV1/FVC            | 63 | 53 | 68 | 487 | 51% | 89% | 53% | 88% |
| Group 1.1, compared with the best FEV1/ the best FVC.                       | 70 | 57 | 69 | 475 | 50% | 89% | 55% | 87% |
| Group 1.1, compared with the FEV1/FVC in the spirometry with the best FEV1. | 66 | 61 | 64 | 480 | 51% | 89% | 52% | 88% |
| Group 1.2, compared with concurrent post-bronchodilator FEV1/FVC            | 60 | 32 | 46 | 341 | 57% | 90% | 62% | 88% |
| Group 1.2, compared with the best FEV1/ the best FVC.                       | 59 | 38 | 50 | 332 | 54% | 90% | 61% | 87% |
| Group 1.2, compared with the FEV1/FVC in the spirometry with the best FEV1. | 59 | 38 | 44 | 338 | 57% | 90% | 61% | 88% |
| Perc15<-915HU                                                               |    |    |    |     |     |     |     |     |
| Group 1.1, compared with concurrent post-bronchodilator FEV1/FVC            | 54 | 23 | 77 | 517 | 42% | 95% | 67% | 87% |
| Group 1.1, compared with the best FEV1/ the best FVC.                       | 55 | 27 | 84 | 505 | 40% | 95% | 67% | 86% |
| Group 1.1, compared with the FEV1/FVC in the spirometry with the best FEV1. | 55 | 27 | 75 | 514 | 42% | 95% | 67% | 87% |
| Group 1.2, compared with concurrent post-bronchodilator FEV1/FVC            | 49 | 19 | 57 | 354 | 46% | 94% | 70% | 86% |
| Group 1.2, compared with the best FEV1/ the best FVC.                       | 48 | 22 | 61 | 348 | 44% | 94% | 69% | 85% |

|                                                                                                  |     |     |     |     |     |     |     |     |
|--------------------------------------------------------------------------------------------------|-----|-----|-----|-----|-----|-----|-----|-----|
| Group 1.2, compared with the FEV1/FVC in the spirometry with the best FEV1.<br>Perc15<-928HU     | 48  | 22  | 55  | 354 | 47% | 94% | 69% | 87% |
| Group 1.1, compared with concurrent post-bronchodilator FEV1/FVC                                 | 33  | 4   | 98  | 536 | 28% | 99% | 86% | 85% |
| Group 1.1, compared with the best FEV1/ the best FVC.                                            | 37  | 6   | 102 | 526 | 27% | 99% | 86% | 84% |
| Group 1.1, compared with the FEV1/FVC in the spirometry with the best FEV1.                      | 37  | 6   | 93  | 535 | 28% | 99% | 86% | 85% |
| Group 1.2, compared with concurrent post-bronchodilator FEV1/FVC                                 | 24  | 0   | 82  | 373 | 23% | 99% | 92% | 82% |
| Group 1.2, compared with the best FEV1/ the best FVC.                                            | 24  | 2   | 85  | 368 | 22% | 99% | 92% | 81% |
| Group 1.2, compared with the FEV1/FVC in the spirometry with the best FEV1.<br>LAA%(-930HU)>1.4% | 24  | 2   | 79  | 374 | 23% | 99% | 92% | 83% |
| Group 1.1, compared with concurrent post-bronchodilator FEV1/FVC                                 | 103 | 142 | 28  | 398 | 79% | 72% | 41% | 93% |
| Group 1.1, compared with the best FEV1/ the best FVC.                                            | 109 | 143 | 30  | 389 | 78% | 73% | 43% | 93% |
| Group 1.1, compared with the FEV1/FVC in the spirometry with the best FEV1.                      | 103 | 149 | 27  | 392 | 79% | 72% | 41% | 94% |
| Group 1.2, compared with concurrent post-bronchodilator FEV1/FVC                                 | 86  | 97  | 20  | 276 | 81% | 73% | 46% | 93% |
| Group 1.2, compared with the best FEV1/ the best FVC.                                            | 87  | 99  | 22  | 271 | 80% | 73% | 47% | 92% |
| Group 1.2, compared with the FEV1/FVC in the spirometry with the best FEV1.<br>LAA%(-930HU)>3.4% | 85  | 101 | 18  | 275 | 83% | 73% | 46% | 94% |
| Group 1.1, compared with concurrent post-bronchodilator FEV1/FVC                                 | 76  | 53  | 55  | 487 | 58% | 90% | 59% | 90% |
| Group 1.1, compared with the best FEV1/ the best FVC.                                            | 80  | 49  | 59  | 483 | 58% | 91% | 62% | 89% |
| Group 1.1, compared with the FEV1/FVC in the spirometry with the best FEV1.                      | 75  | 54  | 55  | 487 | 58% | 90% | 58% | 90% |
| Group 1.2, compared with concurrent post-bronchodilator FEV1/FVC                                 | 72  | 34  | 34  | 339 | 68% | 91% | 68% | 91% |
| Group 1.2, compared with the best FEV1/ the best FVC.                                            | 71  | 35  | 38  | 335 | 65% | 91% | 67% | 90% |
| Group 1.2, compared with the FEV1/FVC in the spirometry with the best FEV1.<br>LAA%(-930HU)>5.2% | 71  | 35  | 32  | 341 | 69% | 91% | 67% | 91% |
| Group 1.1, compared with concurrent post-bronchodilator FEV1/FVC                                 | 65  | 26  | 66  | 514 | 50% | 95% | 71% | 89% |
| Group 1.1, compared with the best FEV1/ the best FVC.                                            | 65  | 26  | 74  | 506 | 47% | 95% | 71% | 87% |
| Group 1.1, compared with the FEV1/FVC in the spirometry with the best FEV1.                      | 65  | 26  | 65  | 515 | 50% | 95% | 71% | 89% |



|                                                                                                 |     |     |    |     |     |     |     |     |
|-------------------------------------------------------------------------------------------------|-----|-----|----|-----|-----|-----|-----|-----|
| Group 1.2, compared with concurrent post-bronchodilator FEV1/FVC                                | 56  | 20  | 50 | 353 | 53% | 95% | 74% | 88% |
| Group 1.2, compared with the best FEV1/ the best FVC.                                           | 56  | 20  | 53 | 350 | 51% | 95% | 74% | 87% |
| Group 1.2, compared with the FEV1/FVC in the spirometry with the best FEV1.<br>LAA%(-930HU)>13% | 56  | 20  | 47 | 356 | 54% | 95% | 74% | 88% |
| Group 1.1, compared with concurrent post-bronchodilator FEV1/FVC                                | 38  | 5   | 93 | 535 | 31% | 99% | 87% | 85% |
| Group 1.1, compared with the best FEV1/ the best FVC.                                           | 40  | 6   | 99 | 526 | 29% | 99% | 87% | 84% |
| Group 1.1, compared with the FEV1/FVC in the spirometry with the best FEV1.                     | 40  | 6   | 90 | 535 | 31% | 99% | 87% | 86% |
| Group 1.2, compared with concurrent post-bronchodilator FEV1/FVC                                | 25  | 1   | 81 | 372 | 24% | 99% | 93% | 82% |
| Group 1.2, compared with the best FEV1/ the best FVC.                                           | 25  | 2   | 84 | 368 | 23% | 99% | 93% | 81% |
| Group 1.2, compared with the FEV1/FVC in the spirometry with the best FEV1.<br>Perc3<-922HU     | 25  | 2   | 78 | 374 | 24% | 99% | 93% | 83% |
| Group 1.1, compared with concurrent post-bronchodilator FEV1/FVC                                | 96  | 124 | 35 | 416 | 76% | 75% | 42% | 93% |
| Group 1.1, compared with the best FEV1/ the best FVC.                                           | 105 | 131 | 34 | 401 | 76% | 75% | 44% | 92% |
| Group 1.1, compared with the FEV1/FVC in the spirometry with the best FEV1.                     | 98  | 138 | 32 | 403 | 75% | 74% | 42% | 93% |
| Group 1.2, compared with concurrent post-bronchodilator FEV1/FVC                                | 85  | 78  | 21 | 295 | 81% | 77% | 50% | 93% |
| Group 1.2, compared with the best FEV1/ the best FVC.                                           | 87  | 85  | 22 | 285 | 80% | 77% | 51% | 93% |
| Group 1.2, compared with the FEV1/FVC in the spirometry with the best FEV1.<br>Perc3<-931HU     | 85  | 87  | 18 | 289 | 83% | 77% | 49% | 94% |
| Group 1.1, compared with concurrent post-bronchodilator FEV1/FVC                                | 75  | 52  | 56 | 488 | 58% | 90% | 58% | 90% |
| Group 1.1, compared with the best FEV1/ the best FVC.                                           | 80  | 51  | 59 | 481 | 58% | 90% | 61% | 89% |
| Group 1.1, compared with the FEV1/FVC in the spirometry with the best FEV1.                     | 75  | 56  | 55 | 485 | 58% | 90% | 57% | 90% |
| Group 1.2, compared with concurrent post-bronchodilator FEV1/FVC                                | 70  | 32  | 36 | 341 | 69% | 90% | 67% | 91% |
| Group 1.2, compared with the best FEV1/ the best FVC.                                           | 72  | 37  | 37 | 333 | 66% | 90% | 66% | 90% |
| Group 1.2, compared with the FEV1/FVC in the spirometry with the best FEV1.<br>Perc3<-937HU     | 72  | 37  | 31 | 339 | 70% | 90% | 66% | 92% |
| Group 1.1, compared with concurrent post-bronchodilator FEV1/FVC                                | 64  | 24  | 67 | 516 | 50% | 95% | 71% | 89% |

|                                                                                               |    |    |    |     |     |     |     |     |
|-----------------------------------------------------------------------------------------------|----|----|----|-----|-----|-----|-----|-----|
| Group 1.1, compared with the best FEV1/ the best FVC.                                         | 65 | 27 | 74 | 505 | 47% | 95% | 71% | 87% |
| Group 1.1, compared with the FEV1/FVC in the spirometry with the best FEV1.                   | 65 | 27 | 65 | 514 | 50% | 95% | 71% | 89% |
| Group 1.2, compared with concurrent post-bronchodilator FEV1/FVC                              | 54 | 16 | 52 | 357 | 53% | 94% | 73% | 88% |
| Group 1.2, compared with the best FEV1/ the best FVC.                                         | 56 | 21 | 53 | 349 | 51% | 94% | 73% | 87% |
| Group 1.2, compared with the FEV1/FVC in the spirometry with the best FEV1.                   | 56 | 21 | 47 | 355 | 54% | 94% | 73% | 88% |
| Perc3<-951HU                                                                                  |    |    |    |     |     |     |     |     |
| Group 1.1, compared with concurrent post-bronchodilator FEV1/FVC                              | 39 | 4  | 92 | 536 | 32% | 99% | 88% | 86% |
| Group 1.1, compared with the best FEV1/ the best FVC.                                         | 42 | 6  | 97 | 526 | 30% | 99% | 88% | 84% |
| Group 1.1, compared with the FEV1/FVC in the spirometry with the best FEV1.                   | 42 | 6  | 88 | 535 | 32% | 99% | 88% | 86% |
| Group 1.2, compared with concurrent post-bronchodilator FEV1/FVC                              | 28 | 4  | 78 | 369 | 28% | 99% | 88% | 83% |
| Group 1.2, compared with the best FEV1/ the best FVC.                                         | 30 | 4  | 79 | 366 | 28% | 99% | 88% | 82% |
| Group 1.2, compared with the FEV1/FVC in the spirometry with the best FEV1.                   | 30 | 4  | 73 | 372 | 29% | 99% | 88% | 84% |
| Model 1: $y_1=0.792*LAA%(-950HU)+0.026*Age(year)+0.608*gender (male=1, female=0)-3.503>-0.64$ |    |    |    |     |     |     |     |     |
| Group 1.1, compared with concurrent post-bronchodilator FEV1/FVC                              | 78 | 57 | 53 | 483 | 60% | 89% | 58% | 90% |
| Group 1.1, compared with the best FEV1/ the best FVC.                                         | 82 | 53 | 57 | 479 | 59% | 90% | 61% | 89% |
| Group 1.1, compared with the FEV1/FVC in the spirometry with the best FEV1.                   | 78 | 57 | 52 | 484 | 60% | 89% | 58% | 90% |
| Group 1.2, compared with concurrent post-bronchodilator FEV1/FVC                              | 61 | 35 | 45 | 338 | 58% | 91% | 64% | 88% |
| Group 1.2, compared with the best FEV1/ the best FVC.                                         | 63 | 33 | 46 | 337 | 58% | 91% | 66% | 88% |
| Group 1.2, compared with the FEV1/FVC in the spirometry with the best FEV1.                   | 63 | 33 | 40 | 343 | 61% | 91% | 66% | 90% |
| Model 1: $y_1=0.792*LAA%(-950HU)+0.026*Age(year)+0.608*gender (male=1, female=0)-3.503>-0.57$ |    |    |    |     |     |     |     |     |
| Group 1.1, compared with concurrent post-bronchodilator FEV1/FVC                              | 74 | 54 | 57 | 486 | 56% | 90% | 58% | 90% |
| Group 1.1, compared with the best FEV1/ the best FVC.                                         | 77 | 51 | 62 | 481 | 55% | 90% | 60% | 89% |
| Group 1.1, compared with the FEV1/FVC in the spirometry with the best FEV1.                   | 75 | 53 | 55 | 488 | 58% | 90% | 59% | 90% |
| Group 1.2, compared with concurrent post-bronchodilator FEV1/FVC                              | 60 | 30 | 46 | 343 | 57% | 92% | 67% | 88% |

|                                                                                                |    |    |    |     |     |     |     |     |
|------------------------------------------------------------------------------------------------|----|----|----|-----|-----|-----|-----|-----|
| Group 1.2, compared with the best FEV1/ the best FVC.                                          | 61 | 29 | 48 | 341 | 56% | 92% | 68% | 88% |
| Group 1.2, compared with the FEV1/FVC in the spirometry with the best FEV1.                    | 61 | 29 | 42 | 347 | 59% | 92% | 68% | 89% |
| Model 1: $y_1=0.792*LAA%(-950HU)+0.026*Age(year)+0.608*gender$ (male=1, female=0)-3.503>-0.15  |    |    |    |     |     |     |     |     |
| Group 1.1, compared with concurrent post-bronchodilator FEV1/FVC                               | 61 | 27 | 70 | 513 | 47% | 95% | 69% | 88% |
| Group 1.1, compared with the best FEV1/ the best FVC.                                          | 62 | 26 | 77 | 506 | 45% | 95% | 70% | 87% |
| Group 1.1, compared with the FEV1/FVC in the spirometry with the best FEV1.                    | 61 | 27 | 69 | 514 | 47% | 95% | 69% | 88% |
| Group 1.2, compared with concurrent post-bronchodilator FEV1/FVC                               | 48 | 15 | 58 | 358 | 45% | 96% | 76% | 86% |
| Group 1.2, compared with the best FEV1/ the best FVC.                                          | 48 | 15 | 61 | 355 | 44% | 96% | 76% | 85% |
| Group 1.2, compared with the FEV1/FVC in the spirometry with the best FEV1.                    | 48 | 15 | 55 | 361 | 47% | 96% | 76% | 87% |
| Model 1: $y_1=0.792*LAA%(-950HU)+0.026*Age(year)+0.608*gender$ (male=1, female=0)-3.503>1.15   |    |    |    |     |     |     |     |     |
| Group 1.1, compared with concurrent post-bronchodilator FEV1/FVC                               | 43 | 6  | 88 | 534 | 33% | 99% | 88% | 86% |
| Group 1.1, compared with the best FEV1/ the best FVC.                                          | 43 | 6  | 96 | 526 | 31% | 99% | 88% | 85% |
| Group 1.1, compared with the FEV1/FVC in the spirometry with the best FEV1.                    | 43 | 6  | 87 | 535 | 33% | 99% | 88% | 86% |
| Group 1.2, compared with concurrent post-bronchodilator FEV1/FVC                               | 33 | 3  | 73 | 370 | 31% | 99% | 92% | 84% |
| Group 1.2, compared with the best FEV1/ the best FVC.                                          | 33 | 3  | 76 | 367 | 30% | 99% | 92% | 83% |
| Group 1.2, compared with the FEV1/FVC in the spirometry with the best FEV1.                    | 33 | 3  | 70 | 373 | 32% | 99% | 92% | 84% |
| Model 2:<br>$y_2=0.68*LAA%(-950HU)-0.017*Perc15+0.029*Age(year)+0.023*Weight(kg)-20.132>-0.89$ |    |    |    |     |     |     |     |     |
| Group 1.1, compared with concurrent post-bronchodilator FEV1/FVC                               | 78 | 57 | 53 | 483 | 60% | 89% | 58% | 90% |
| Group 1.1, compared with the best FEV1/ the best FVC.                                          | 81 | 54 | 58 | 478 | 58% | 90% | 60% | 89% |
| Group 1.1, compared with the FEV1/FVC in the spirometry with the best FEV1.                    | 78 | 57 | 52 | 484 | 60% | 89% | 58% | 90% |
| Group 1.2, compared with concurrent post-bronchodilator FEV1/FVC                               | 69 | 38 | 37 | 335 | 65% | 90% | 64% | 90% |
| Group 1.2, compared with the best FEV1/ the best FVC.                                          | 70 | 37 | 39 | 333 | 64% | 90% | 65% | 90% |
| Group 1.2, compared with the FEV1/FVC in the spirometry with the best FEV1.                    | 70 | 37 | 33 | 339 | 68% | 90% | 65% | 91% |

Model 2:

$$y_2 = 0.68 * LAA\% (-950HU) - 0.017 * Perc15 + 0.029 * Age(year) + 0.023 * Weight(kg) - 20.132 > -0.83$$

|                                                                             |    |    |    |     |     |     |     |     |
|-----------------------------------------------------------------------------|----|----|----|-----|-----|-----|-----|-----|
| Group 1.1, compared with concurrent post-bronchodilator FEV1/FVC            | 77 | 54 | 54 | 486 | 59% | 90% | 59% | 90% |
| Group 1.1, compared with the best FEV1/ the best FVC.                       | 80 | 51 | 59 | 481 | 58% | 90% | 61% | 89% |
| Group 1.1, compared with the FEV1/FVC in the spirometry with the best FEV1. | 78 | 53 | 52 | 488 | 60% | 90% | 60% | 90% |
| Group 1.2, compared with concurrent post-bronchodilator FEV1/FVC            | 64 | 36 | 42 | 337 | 60% | 90% | 64% | 89% |
| Group 1.2, compared with the best FEV1/ the best FVC.                       | 65 | 35 | 44 | 335 | 60% | 91% | 65% | 88% |
| Group 1.2, compared with the FEV1/FVC in the spirometry with the best FEV1. | 65 | 35 | 38 | 341 | 63% | 91% | 65% | 90% |

Model 2:

$$y_2 = 0.68 * LAA\% (-950HU) - 0.017 * Perc15 + 0.029 * Age(year) + 0.023 * Weight(kg) - 20.132 > -0.43$$

|                                                                             |    |    |    |     |     |     |     |     |
|-----------------------------------------------------------------------------|----|----|----|-----|-----|-----|-----|-----|
| Group 1.1, compared with concurrent post-bronchodilator FEV1/FVC            | 65 | 27 | 66 | 513 | 50% | 95% | 71% | 89% |
| Group 1.1, compared with the best FEV1/ the best FVC.                       | 65 | 27 | 74 | 505 | 47% | 95% | 71% | 87% |
| Group 1.1, compared with the FEV1/FVC in the spirometry with the best FEV1. | 65 | 27 | 65 | 514 | 50% | 95% | 71% | 89% |
| Group 1.2, compared with concurrent post-bronchodilator FEV1/FVC            | 53 | 15 | 53 | 358 | 50% | 96% | 78% | 87% |
| Group 1.2, compared with the best FEV1/ the best FVC.                       | 53 | 15 | 56 | 355 | 49% | 96% | 78% | 86% |
| Group 1.2, compared with the FEV1/FVC in the spirometry with the best FEV1. | 53 | 15 | 50 | 361 | 51% | 96% | 78% | 88% |

Model 2:

$$y_2 = 0.68 * LAA\% (-950HU) - 0.017 * Perc15 + 0.029 * Age(year) + 0.023 * Weight(kg) - 20.132 > 0.76$$

|                                                                             |    |   |    |     |     |     |     |     |
|-----------------------------------------------------------------------------|----|---|----|-----|-----|-----|-----|-----|
| Group 1.1, compared with concurrent post-bronchodilator FEV1/FVC            | 45 | 6 | 86 | 534 | 34% | 99% | 88% | 86% |
| Group 1.1, compared with the best FEV1/ the best FVC.                       | 45 | 6 | 94 | 526 | 32% | 99% | 88% | 85% |
| Group 1.1, compared with the FEV1/FVC in the spirometry with the best FEV1. | 45 | 6 | 85 | 535 | 35% | 99% | 88% | 86% |
| Group 1.2, compared with concurrent post-bronchodilator FEV1/FVC            | 34 | 3 | 72 | 370 | 32% | 99% | 92% | 84% |
| Group 1.2, compared with the best FEV1/ the best FVC.                       | 34 | 3 | 75 | 367 | 31% | 99% | 92% | 83% |
| Group 1.2, compared with the FEV1/FVC in the spirometry with the best FEV1. | 34 | 3 | 69 | 373 | 33% | 99% | 92% | 84% |

Model 3:

$$y_3 = 0.168 * LAA\%(-930HU) - 0.064 * Perc3 + 0.039 * Perc15 + 0.026 * Age(year) - 27.515 > -1.71$$

|                                                                             |     |     |    |     |     |     |     |     |
|-----------------------------------------------------------------------------|-----|-----|----|-----|-----|-----|-----|-----|
| Group 1.1, compared with concurrent post-bronchodilator FEV1/FVC            | 104 | 116 | 27 | 424 | 79% | 79% | 47% | 94% |
| Group 1.1, compared with the best FEV1/ the best FVC.                       | 109 | 111 | 30 | 421 | 78% | 79% | 50% | 93% |
| Group 1.1, compared with the FEV1/FVC in the spirometry with the best FEV1. | 104 | 116 | 26 | 425 | 80% | 79% | 47% | 94% |
| Group 1.2, compared with concurrent post-bronchodilator FEV1/FVC            | 85  | 80  | 21 | 293 | 80% | 79% | 52% | 93% |
| Group 1.2, compared with the best FEV1/ the best FVC.                       | 86  | 79  | 23 | 291 | 79% | 79% | 52% | 93% |
| Group 1.2, compared with the FEV1/FVC in the spirometry with the best FEV1. | 85  | 80  | 18 | 296 | 83% | 79% | 52% | 94% |

Model 3:

$$y_3 = 0.168 * LAA\%(-930HU) - 0.064 * Perc3 + 0.039 * Perc15 + 0.026 * Age(year) - 27.515 > -1.13$$

|                                                                             |    |    |    |     |     |     |     |     |
|-----------------------------------------------------------------------------|----|----|----|-----|-----|-----|-----|-----|
| Group 1.1, compared with concurrent post-bronchodilator FEV1/FVC            | 79 | 53 | 52 | 487 | 60% | 90% | 60% | 90% |
| Group 1.1, compared with the best FEV1/ the best FVC.                       | 82 | 50 | 57 | 482 | 59% | 91% | 62% | 89% |
| Group 1.1, compared with the FEV1/FVC in the spirometry with the best FEV1. | 78 | 54 | 52 | 487 | 60% | 90% | 59% | 90% |
| Group 1.2, compared with concurrent post-bronchodilator FEV1/FVC            | 72 | 36 | 34 | 337 | 68% | 90% | 67% | 91% |
| Group 1.2, compared with the best FEV1/ the best FVC.                       | 73 | 35 | 36 | 335 | 67% | 91% | 68% | 90% |
| Group 1.2, compared with the FEV1/FVC in the spirometry with the best FEV1. | 73 | 35 | 30 | 341 | 71% | 91% | 68% | 92% |

Model 3:

$$y_3 = 0.168 * LAA\%(-930HU) - 0.064 * Perc3 + 0.039 * Perc15 + 0.026 * Age(year) - 27.515 > -0.63$$

|                                                                             |    |    |    |     |     |     |     |     |
|-----------------------------------------------------------------------------|----|----|----|-----|-----|-----|-----|-----|
| Group 1.1, compared with concurrent post-bronchodilator FEV1/FVC            | 69 | 27 | 62 | 513 | 53% | 95% | 72% | 89% |
| Group 1.1, compared with the best FEV1/ the best FVC.                       | 70 | 26 | 69 | 506 | 50% | 95% | 73% | 88% |
| Group 1.1, compared with the FEV1/FVC in the spirometry with the best FEV1. | 69 | 27 | 61 | 514 | 53% | 95% | 72% | 89% |
| Group 1.2, compared with concurrent post-bronchodilator FEV1/FVC            | 58 | 21 | 48 | 352 | 55% | 94% | 73% | 88% |
| Group 1.2, compared with the best FEV1/ the best FVC.                       | 58 | 21 | 51 | 349 | 53% | 94% | 73% | 87% |
| Group 1.2, compared with the FEV1/FVC in the spirometry with the best FEV1. | 58 | 21 | 45 | 355 | 56% | 94% | 73% | 89% |

Model 3:

$$y_3 = 0.168 * LAA\%(-930HU) - 0.064 * Perc3 + 0.039 * Perc15 + 0.026 * Age(year) - 27.515 > 1.03$$

|                                                                             |    |   |    |     |     |     |     |     |
|-----------------------------------------------------------------------------|----|---|----|-----|-----|-----|-----|-----|
| Group 1.1, compared with concurrent post-bronchodilator FEV1/FVC            | 44 | 5 | 87 | 535 | 34% | 99% | 90% | 86% |
| Group 1.1, compared with the best FEV1/ the best FVC.                       | 44 | 5 | 95 | 527 | 32% | 99% | 90% | 85% |
| Group 1.1, compared with the FEV1/FVC in the spirometry with the best FEV1. | 44 | 5 | 86 | 536 | 34% | 99% | 90% | 86% |
| Group 1.2, compared with concurrent post-bronchodilator FEV1/FVC            | 29 | 6 | 77 | 367 | 27% | 98% | 83% | 83% |
| Group 1.2, compared with the best FEV1/ the best FVC.                       | 29 | 6 | 80 | 364 | 27% | 98% | 83% | 82% |
| Group 1.2, compared with the FEV1/FVC in the spirometry with the best FEV1. | 29 | 6 | 74 | 370 | 28% | 98% | 83% | 83% |

Model 4:

$$y_4 = 0.218 * Perc4 - 0.554 * Perc8 + 0.614 * Perc33 - 0.321 * Perc43 + 0.042 * Perc97 - 0.304 * LAA\%(-973HU) + 0.187 * LAA\%(-927HU) + 1.633 * LAA\%(-292HU) - 190.496 > -1.43$$

|                                                                             |     |    |    |     |     |     |     |     |
|-----------------------------------------------------------------------------|-----|----|----|-----|-----|-----|-----|-----|
| Group 1.1, compared with concurrent post-bronchodilator FEV1/FVC            | 100 | 56 | 31 | 484 | 76% | 90% | 64% | 94% |
| Group 1.1, compared with the best FEV1/ the best FVC.                       | 104 | 52 | 35 | 480 | 75% | 90% | 67% | 93% |
| Group 1.1, compared with the FEV1/FVC in the spirometry with the best FEV1. | 98  | 58 | 32 | 483 | 75% | 89% | 63% | 94% |
| Group 1.2, compared with concurrent post-bronchodilator FEV1/FVC            | 72  | 35 | 34 | 338 | 68% | 91% | 67% | 91% |
| Group 1.2, compared with the best FEV1/ the best FVC.                       | 73  | 34 | 36 | 336 | 67% | 91% | 68% | 90% |
| Group 1.2, compared with the FEV1/FVC in the spirometry with the best FEV1. | 73  | 34 | 30 | 342 | 71% | 91% | 68% | 92% |

Model 4:

$$y_4 = 0.218 * Perc4 - 0.554 * Perc8 + 0.614 * Perc33 - 0.321 * Perc43 + 0.042 * Perc97 - 0.304 * LAA\%(-973HU) + 0.187 * LAA\%(-927HU) + 1.633 * LAA\%(-292HU) - 190.496 > -1.37$$

|                                                                             |     |    |    |     |     |     |     |     |
|-----------------------------------------------------------------------------|-----|----|----|-----|-----|-----|-----|-----|
| Group 1.1, compared with concurrent post-bronchodilator FEV1/FVC            | 99  | 55 | 32 | 485 | 76% | 90% | 64% | 94% |
| Group 1.1, compared with the best FEV1/ the best FVC.                       | 103 | 51 | 36 | 481 | 74% | 90% | 67% | 93% |
| Group 1.1, compared with the FEV1/FVC in the spirometry with the best FEV1. | 97  | 57 | 33 | 484 | 75% | 89% | 63% | 94% |
| Group 1.2, compared with concurrent post-bronchodilator FEV1/FVC            | 70  | 33 | 36 | 340 | 66% | 91% | 68% | 90% |
| Group 1.2, compared with the best FEV1/ the best FVC.                       | 71  | 32 | 38 | 338 | 65% | 91% | 69% | 90% |
| Group 1.2, compared with the FEV1/FVC in the spirometry with the best FEV1. | 71  | 32 | 32 | 344 | 69% | 91% | 69% | 91% |

Model 4:

$$y_4 = 0.218 * \text{Perc4} - 0.554 * \text{Perc8} + 0.614 * \text{Perc33} - 0.321 * \text{Perc43} + 0.042 * \text{Perc97} - 0.304 * \text{LAA\%}(-973\text{HU}) + 0.187 * \text{LAA\%}(-927\text{HU}) + 1.633 * \text{LAA\%}(-292\text{HU}) - 190.496 > -0.7$$

|                                                                             |    |    |    |     |     |     |     |     |
|-----------------------------------------------------------------------------|----|----|----|-----|-----|-----|-----|-----|
| Group 1.1, compared with concurrent post-bronchodilator FEV1/FVC            | 82 | 27 | 49 | 513 | 63% | 95% | 75% | 91% |
| Group 1.1, compared with the best FEV1/ the best FVC.                       | 83 | 26 | 56 | 506 | 60% | 95% | 76% | 90% |
| Group 1.1, compared with the FEV1/FVC in the spirometry with the best FEV1. | 81 | 28 | 49 | 513 | 62% | 95% | 74% | 91% |
| Group 1.2, compared with concurrent post-bronchodilator FEV1/FVC            | 65 | 13 | 41 | 360 | 61% | 97% | 83% | 90% |
| Group 1.2, compared with the best FEV1/ the best FVC.                       | 65 | 13 | 44 | 357 | 60% | 96% | 83% | 89% |
| Group 1.2, compared with the FEV1/FVC in the spirometry with the best FEV1. | 65 | 13 | 38 | 363 | 63% | 97% | 83% | 91% |

Model 4:

$$y_4 = 0.218 * \text{Perc4} - 0.554 * \text{Perc8} + 0.614 * \text{Perc33} - 0.321 * \text{Perc43} + 0.042 * \text{Perc97} - 0.304 * \text{LAA\%}(-973\text{HU}) + 0.187 * \text{LAA\%}(-927\text{HU}) + 1.633 * \text{LAA\%}(-292\text{HU}) - 190.496 > 0.57$$

|                                                                             |    |   |    |     |     |     |     |     |
|-----------------------------------------------------------------------------|----|---|----|-----|-----|-----|-----|-----|
| Group 1.1, compared with concurrent post-bronchodilator FEV1/FVC            | 57 | 6 | 74 | 534 | 44% | 99% | 90% | 88% |
| Group 1.1, compared with the best FEV1/ the best FVC.                       | 57 | 6 | 82 | 526 | 41% | 99% | 90% | 87% |
| Group 1.1, compared with the FEV1/FVC in the spirometry with the best FEV1. | 57 | 6 | 73 | 535 | 44% | 99% | 90% | 88% |
| Group 1.2, compared with concurrent post-bronchodilator FEV1/FVC            | 38 | 2 | 68 | 371 | 36% | 99% | 95% | 85% |
| Group 1.2, compared with the best FEV1/ the best FVC.                       | 38 | 2 | 71 | 368 | 35% | 99% | 95% | 84% |
| Group 1.2, compared with the FEV1/FVC in the spirometry with the best FEV1. | 38 | 2 | 65 | 374 | 37% | 99% | 95% | 85% |

a: True positives, (with obvious emphysema and persistent airflow limitation); b: False positives, (with obvious emphysema but without persistent airflow limitation); c: False negatives, (without obvious emphysema but with persistent airflow limitation); d: True negatives, (without obvious emphysema and persistent airflow limitation). LAA%: percentage of the lung volume occupied by low attenuation areas; Perc n: percentile of the histogram of attenuation values; PPV: positive predictive values; NPV: negative predictive values.
